# Supplementary material for: Targeted Gene Delivery into Various Plastids Mediated by Clustered Cell‐Penetrating and Chloroplast‐Targeting Peptides
Source: PubMed Central journal article supplement (PMC6891901; doi:10.1002/advs.201902064), 2019-10-23
Supplement: ADVS-6-1902064-s001.pdf [file ADVS-6-1902064-s001.pdf]

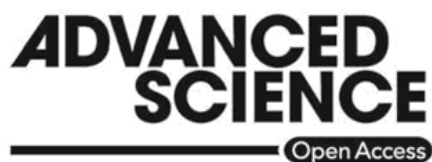

## Supporting Information

for *Adv. Sci.*, DOI: 10.1002/advs.201902064

**Targeted Gene Delivery into Various Plastids Mediated by  
Clustered Cell-Penetrating and Chloroplast-Targeting Peptides**

*Chonprakun Thagun, Jo-Ann Chuah, and Keiji Numata\**

((Supporting Information can be included here using this template))

Copyright WILEY-VCH Verlag GmbH & Co. KGaA, 69469 Weinheim, Germany, 2016.

## Supporting Information

**Title** Targeted gene delivery into various plastids mediated by clustered cell-penetrating and chloroplast-targeting peptides.

Chonprakun Thagun, Jo-Ann Chuah, and Keiji Numata \*

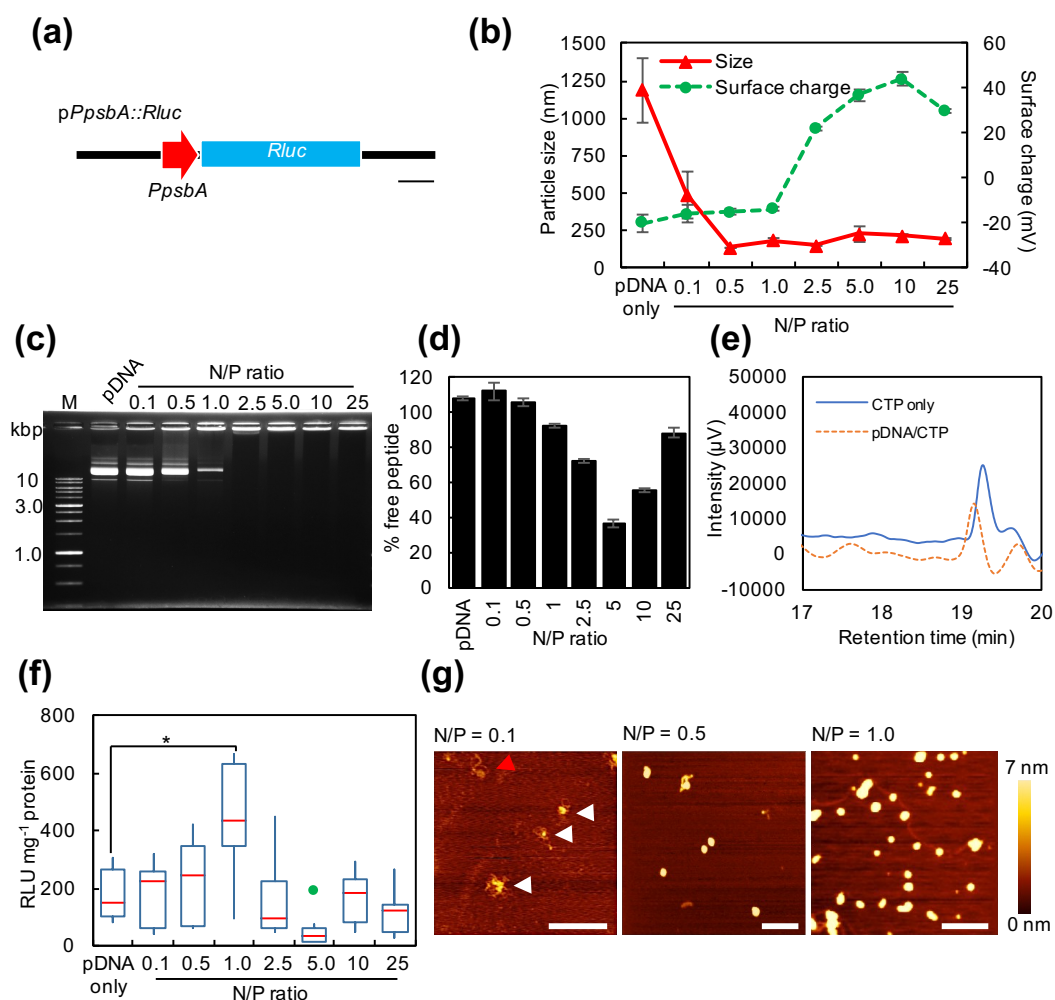

**Figure S1. Characterization of pDNA(pPpsbA::Rluc)/CTP (KH<sub>9</sub>-OEP34) complexes.**

(a) Expression cassette of the *Renilla luciferase* (*Rluc*) gene driven by the light-inducible *psbA* gene promoter (*PpsbA*) for specific transgene expression in the plant plastids. Bar = 200 bp. (b) Particle size and surface charge of the pDNA/KH<sub>9</sub>-OEP34 complexes formed at

17 different peptide-to-plasmid DNA ratios (N/P ratio) analyzed by a Zeta Nanosizer. Error bars  
18 represent the SD of the average value from 3 replicates. (c) Electrophoretic mobility-shift  
19 assays of the pDNA/KH<sub>9</sub>-OEP34 complexes at various N/P ratios. (d) Abundance of free  
20 KH<sub>9</sub>-OEP34 in the pDNA/CTP complex solution at different N/P ratios. Error bars represent  
21 the standard deviation (SD) of the average intensity from three replicates. (e) HPLC  
22 chromatograms of free polypeptide in the solutions with and without the pDNA/CTP complex  
23 formation at N/P ratio = 1.0. (f) *Renilla* luciferase activity in *Arabidopsis thaliana* leaves  
24 syringe-infiltrated with the p*PpsbA*::*Rluc*/KH<sub>9</sub>-OEP34 complexes formed at different N/P  
25 ratios at 24 hours post-infiltration. The data are presented in the form of a box plot. Red lines  
26 represent the median value of data from 8 independent biological samples ( $n = 8$ ). Maximum  
27 and minimum values are shown by the upper and lower bars. The green dot shows the outlier  
28 in the distribution of data. The asterisk indicates the significant difference of the mean value  
29 compared to that of the pDNA-only control treatment analyzed by Student's *t*-test at  $p < 0.05$ .  
30 (g) AFM images of the pDNA/CTP complexes at N/P ratios of 0.1, 0.5 and 1.0. Scale bars =  
31 500 nm. The heat map represents the height of complexes on the mica surface.  
32

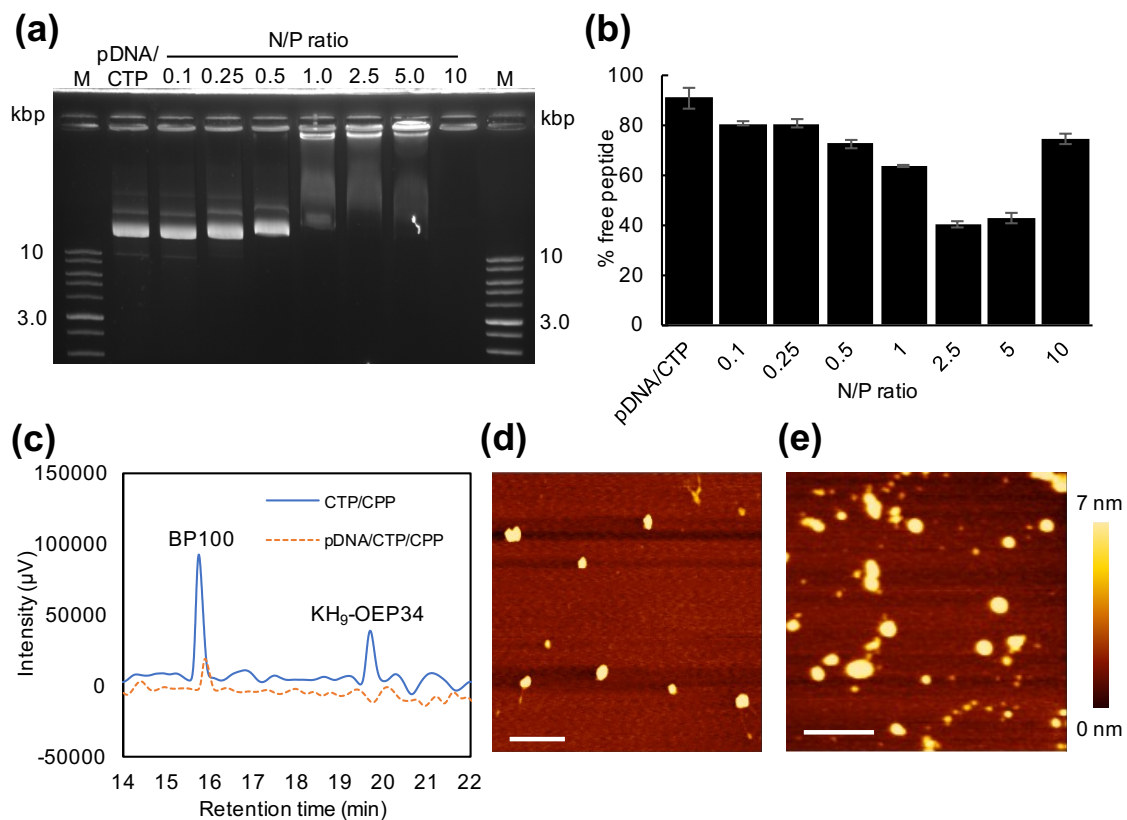

34

35 **Figure S2. Gel mobility shifts and size distribution of the clustered pDNA/KH<sub>9</sub>-**  
 36 **OEP34/BP100 complexes.**

37 **(a)** Agarose gel electrophoresis of the pDNA(p*PpsbA*::*Rluc*)/KH<sub>9</sub>-OEP34/BP100 complexes  
 38 formed at various N/P ratios. **(b)** Abundance of free peptides in the pDNA/CTP/CTP complex  
 39 solution formed at different N/P ratios. Error bars represent the standard deviation (SD) of the  
 40 average intensity from three replicates. **(c)** HPLC chromatogram of polypeptide solution with  
 41 and without pDNA molecule at N/P ratio = 1.0. **(d)** and **(e)** Morphologies of the  
 42 pDNA/CTP/CTP complexes formed at N/P ratios of 0.5 **(d)** and 2.5 **(e)**. Scale bars = 500 nm.  
 43 The heat map represents the height of complexes on the mica surface.

44

45

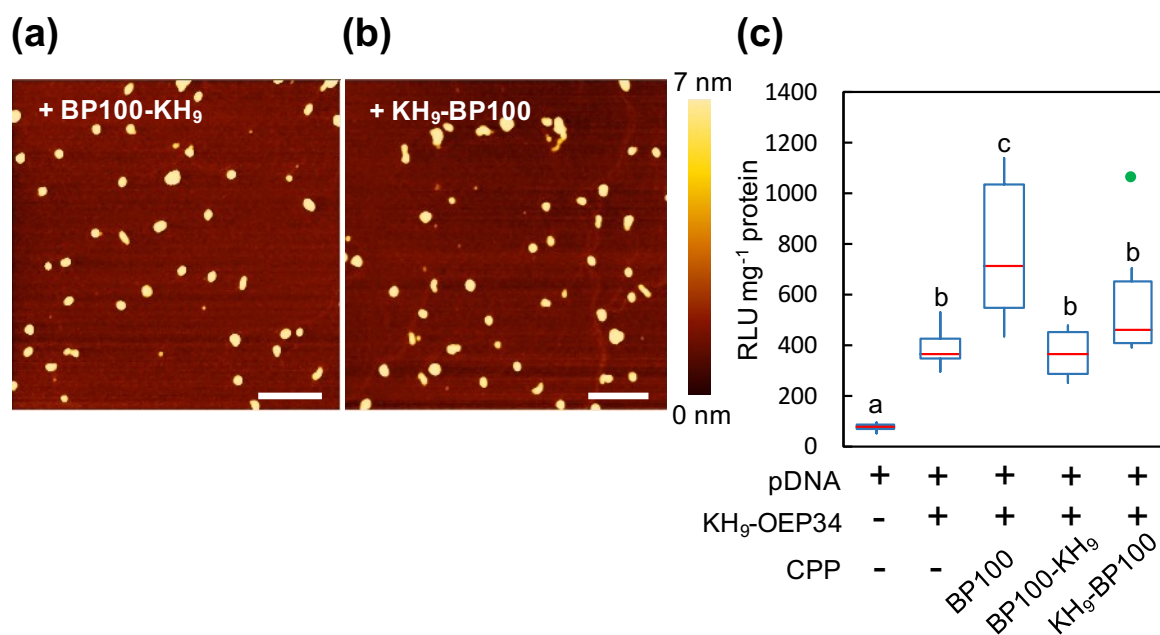

46

47 **Figure S3. Efficiencies of the clustered pDNA/CTP/CPP complexes formulated using**  
 48 **different BP100 derivatives for plastid transformation.**

49 (a) and (b) Morphologies of the clustered pDNA/CTP/CPP complexes formulated using  
 50 BP100 derivatives, BP100-KH<sub>9</sub> or KH<sub>9</sub>-BP100, at an N/P ratio of 1.0 observed by AFM.  
 51 Scale bars = 500 nm. The heat map represents the height of complexes on the mica surface.

52 (c) Transformation efficiencies of the different clustered complexes formed using different  
 53 BP100 derivatives (as the CPP). The distribution of Rluc activity in six *N. benthamiana*  
 54 leaves ( $n = 6$ ) transformed with a complex solution or a solution containing pDNA alone as a  
 55 control at 24 hours post-infiltration is shown in the form of a box plot. Red lines indicate the  
 56 median value. The green dot shows the outlier in the distribution of data. The letters indicate  
 57 the significant difference of the average Rluc activity among samples infiltrated with different  
 58 complex solutions analyzed by one-way ANOVA and Tukey's HSD test at  $p = 0.05$ .

59

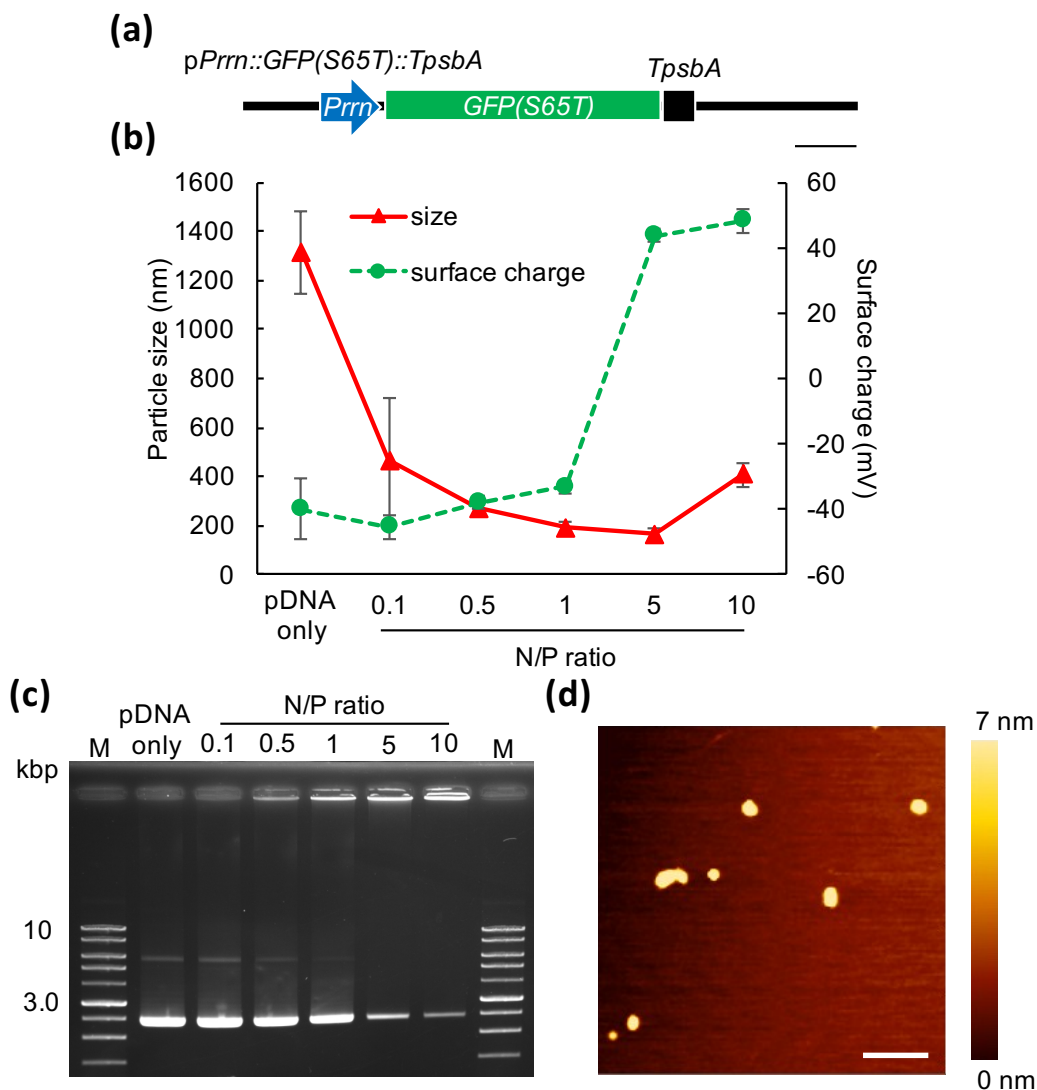

61  
 62 **Figure S4. Characterization of the pDNA(pPrn::GFP(S65T)::TpsbA)/CTP (KH<sub>9</sub>-**  
 63 **OEP34) complexes for fluorescent reporter protein expression in plastids.**

64 (a) Expression cassette for GFP expression in plastids. The *GFP(S65T)* gene was  
 65 transcriptionally fused to the plastid-specific *rrn* promoter and *psbA3*'-UTR sequence (*TpsbA*).  
 66 Bar = 200 bp. (b) Particle size and surface charge of the pDNA/KH<sub>9</sub>-OEP34 complexes  
 67 formed at various N/P ratios. Error bars show the SD of the average value from 3 replicates.  
 68 (c) Electrophoretic mobility-shift assay of the pDNA(pPrn::GFP(S65T)::TpsbA)/KH<sub>9</sub>-  
 69 OEP34 complexes at different N/P ratios. (d) AFM imaging of pDNA/KH<sub>9</sub>-OEP34  
 70 complexes formed at an N/P ratio of 1.0. Scale bar = 500 nm. The heat map represents the  
 71 height of complexes on the mica surface.

72

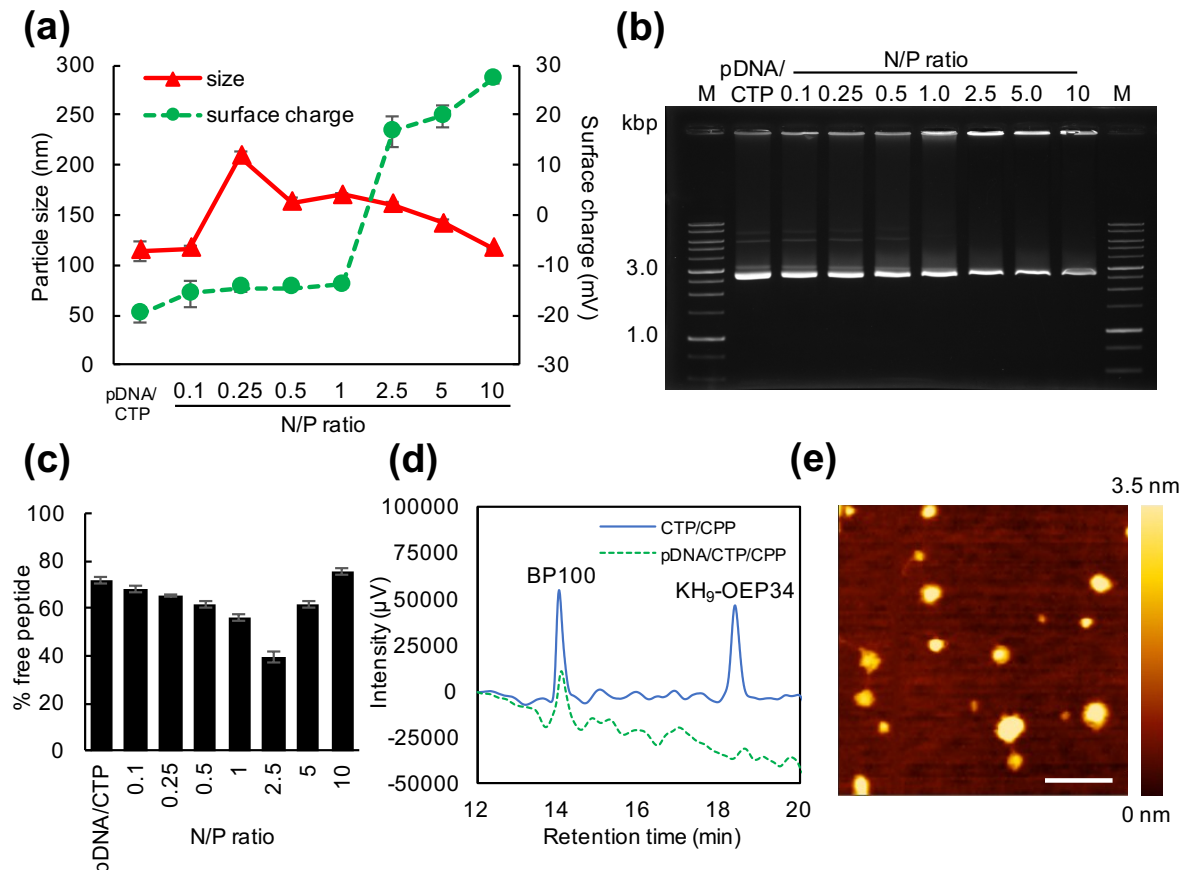

73

74 **Figure S5. Characterization of the clustered pDNA(pPrn::GFP(S65T)::TpsbA)/KH<sub>9</sub>-**  
 75 **OEP34/BP100 complexes for fluorescent reporter protein expression in plastids.**

76 (a) Particle size and surface charge of pDNA/KH<sub>9</sub>-OEP34/BP100 complexes formed at  
 77 different N/P ratios. Error bars represent the SD of the average value from three replicates. (b)

78 Electrophoretic mobility-shift assay of pDNA/KH<sub>9</sub>-OEP34/BP100 complexes formed at

79 different N/P ratios. (c) Abundance of free peptide in the pDNA/CTP/CTP complex solution

80 formed at different N/P ratios. Error bars represent the standard deviation (SD) of the average

81 intensity from three replicates. (d) HPLC chromatogram of polypeptide solution with and

82 without pDNA molecule at N/P ratio = 1.0. (e) AFM imaging of the pDNA/CTP/CTP

83 complexes formed at an N/P ratio of 1.0. Scale bar = 500 nm. The heat map shows the height

84 of complexes on the mica surface.

85

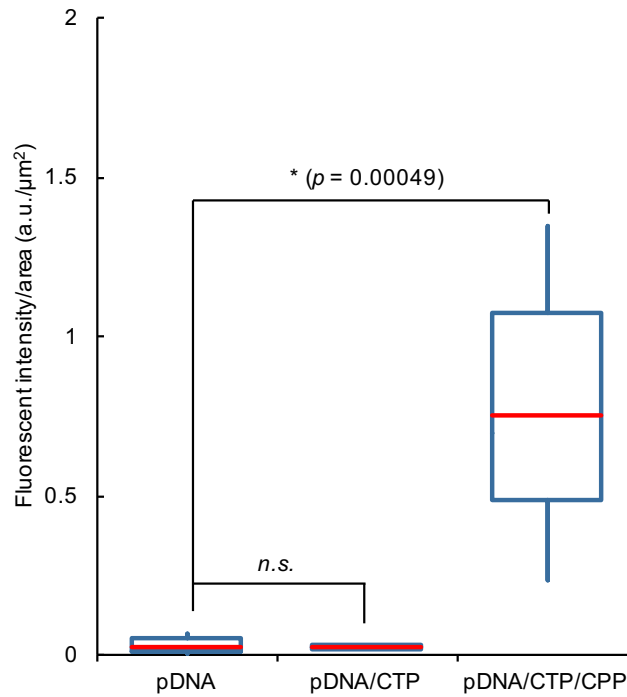

86

87 **Figure S6. GFP fluorescence in *Arabidopsis* leaf cells transfected by pDNA/peptide**  
88 **complexes.**

89 The expression of GFP was observed by CLSM at 24 hours post-transfection. The CLSM  
90 images were taken from 5 regions of interest (ROIs) of 5 pDNA only-treated and pDNA/CTP  
91 complex-infiltrated leaves ( $n = 5$ ), and 10 ROIs of 5 pDNA/CTP/CTP complex-infiltrated  
92 leaves ( $n = 10$ ). The fluorescent intensities in these images were determined and normalized  
93 per area of observation (a.u./μm<sup>2</sup>). The distributions of fluorescent intensity per area were  
94 represented by box plot. Red lines represent mean of data. The asterisk indicates the  
95 significant difference of mean analyzed by Student's *t-test*. n.s. shows non-statistically  
96 difference between two treatments at  $p < 0.05$ .

97



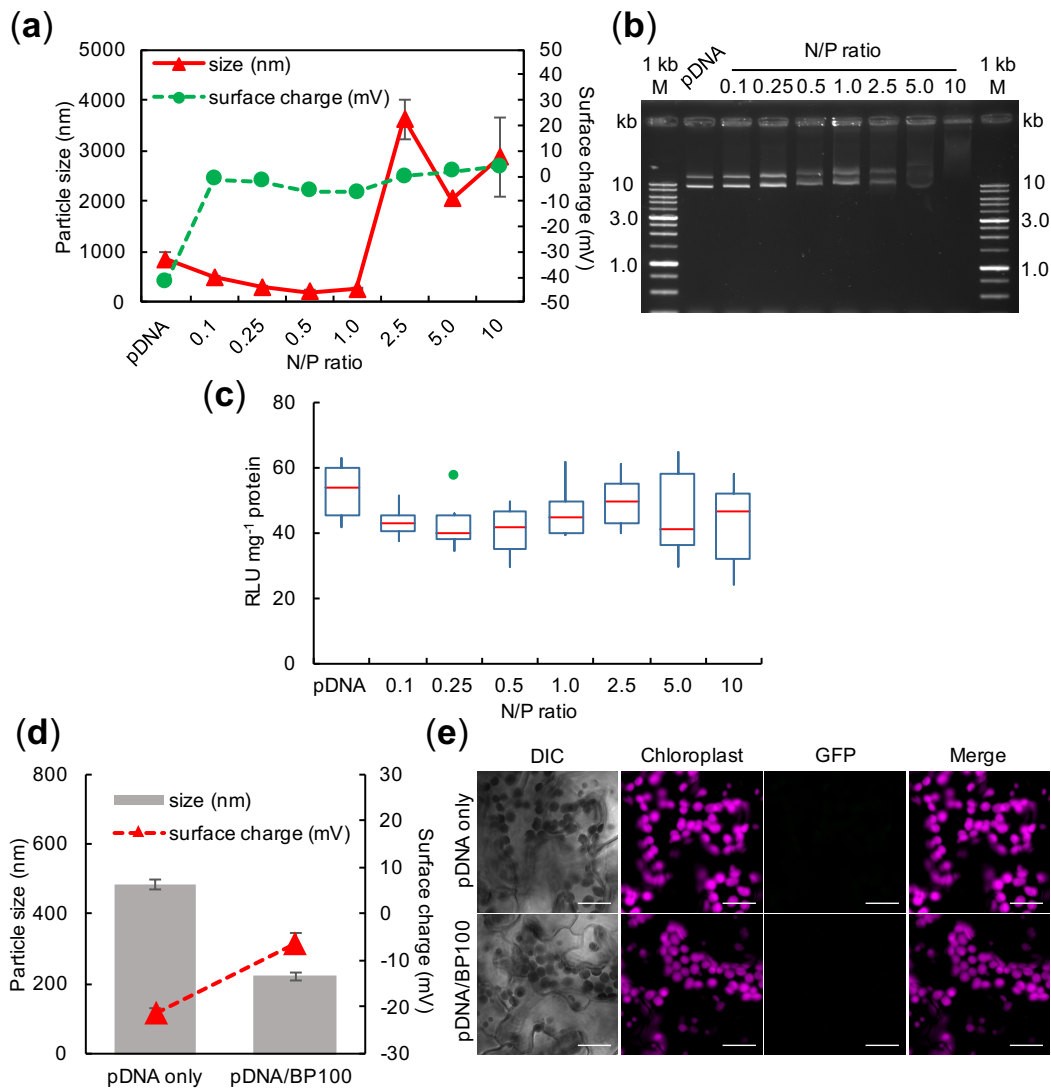

98

99 **Figure S7. Performance of pDNA/BP100 complex in plastid-targeting gene delivery.**

100 (a) Particle size and surface charge of pDNA/BP100 complexes formed at various N/P ratios.

101 Error bars represent the standard deviations of the average value from 3 replicates. (b)

102 Electrophoretic mobility shifts of p*PpsbA*::*Rluc*/BP100 complexes at different N/P ratios. (c)

103 Luciferase activities in p*PpsbA*::*Rluc*/BP100 complex-transfected Arabidopsis leaves. The

104 distribution of Rluc activities in 8 Arabidopsis leaves transfected with the pDNA/BP100

105 complex at 24 hours post-transfection is shown as the form of box plot. Red lines represent

106 the median values. The green dot indicates the outlier in the distribution of data. (d) Particle

107 size and surface charge of p*Prrn*::*GFP(S65T)*::*TpsbA*/BP100 complex formed at N/P ratio =

108 1.0. Error bars represent the standard deviation (SD) of the average value from three

109 replicates. (e) CLSM observation of GFP in *Arabidopsis* leaves at 24 hours post-infiltration

110 with p*Prrn*::*GFP(S65T)*::*TpsbA*/BP100 complexes. Scale bars = 20 μm.

111

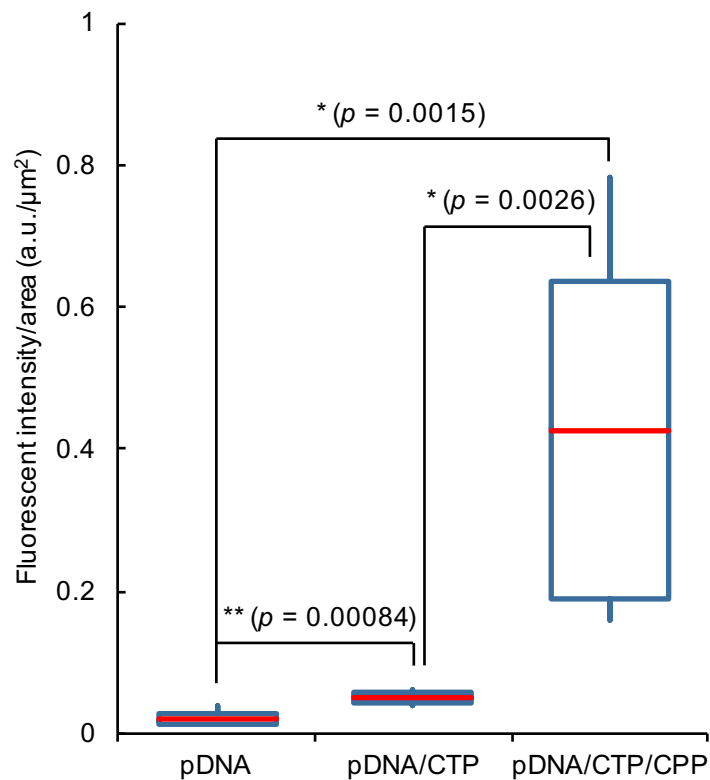

112

113 **Figure S8. GFP expression in *Nicotiana benthamiana* leaf cells transfected by**  
 114 **pDNA/CTP/PPP complexes.**

115 The expression of GFP was observed by CLSM at 24 hours post-transfection. The CLSM  
 116 images were taken from 5 regions of interest (ROIs) of 5 pDNA-only-treated and pDNA/CTP  
 117 complexes-infiltrated leaves ( $n = 5$ ), and 10 ROIs of 5 pDNA/CTP/PPP complexes-infiltrated  
 118 leaves ( $n = 10$ ). The fluorescent intensities in these images were determined and normalized  
 119 per area of observation (a.u./ $\mu\text{m}^2$ ). The distributions of fluorescent intensity per area were  
 120 represented by box plot. The red lines represent mean of data. The asterisks indicate the levels  
 121 of statistical difference of mean analyzed by Student's *t*-test. \* =  $p < 0.01$ , \*\* =  $p < 0.001$ .

122

123

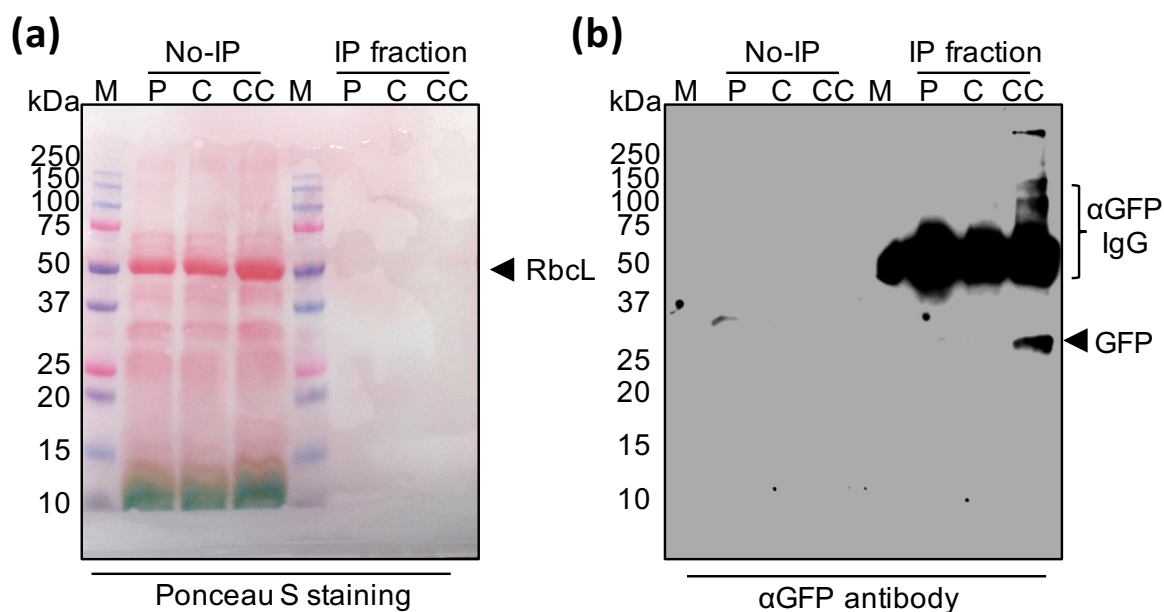

124

125 **Figure S9. Immunoprecipitation and western blotting for the detection of GFP in the**  
 126 **chloroplasts of *N. benthamiana* delivered using the clustered pDNA/CTP/CPP complexes.**

127 (a) Ponceau S-stained membrane after protein transfer onto the PVDF membrane determined  
 128 by equal loading of protein isolated from the chloroplasts of complex-transformed plant  
 129 leaves (No-IP) and immunoprecipitated proteins against anti-GFP antibody (IP fraction). The  
 130 arrow indicates the equal amount of the large subunit of the Rubisco protein (RbcL) as an  
 131 internal control. (b) Complete immunoblot image for **Figure 4b**. In (a) and (b), M is the dual-  
 132 colored Precision Plus® protein marker (Bio-Rad Laboratory). P is the protein sample  
 133 isolated from the chloroplasts of plants infiltrated with pDNA only, C represents the  
 134 pDNA/CTP complex, and CC stands for the clustered pDNA/CTP/CPP complex-transformed  
 135 plant tissues. The arrow indicates the GFP band in the image after exposure to LAS3000 for  
 136 15 min.

137

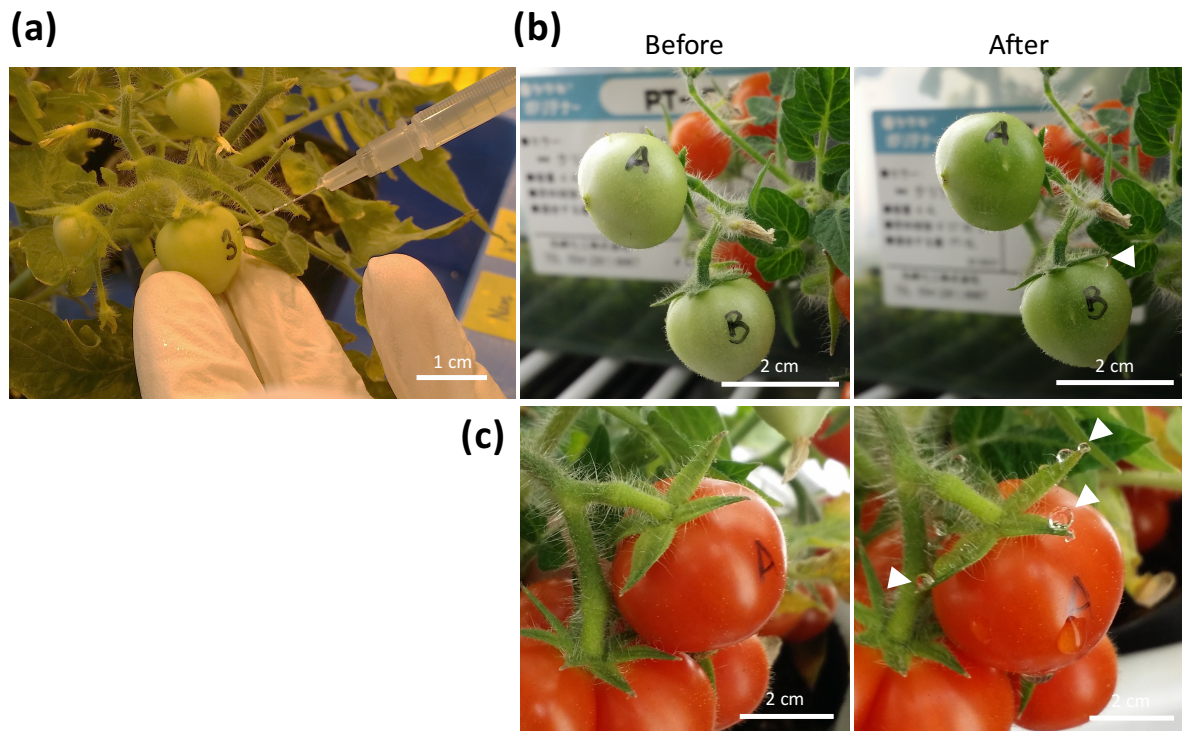

138

139 **Figure S10. Tomato fruit injection.**

140 (a) Introduction of the complex solution into the mature-green tomato fruit by injection.

141 Mature-green fruits (~ 1.5 – 2 cm in diameter) of *Solanum lycopersicum* (cv. MicroTOM)

142 grown in the plant growth chamber were injected with a solution containing the clustered

143 pDNA/CTP/PPP complexes using a needle-attached syringe. A similar protocol was used for

144 the ripened-red fruits. (b) and (c) Complete introduction of the complex solution into the

145 tomato fruit was determined by excess amounts of solution at the sepal tips of the injected

146 fruits (indicated by arrows) after injection of a mature-green fruit (b) and a ripened-red fruit

147 (c). The fruit color was also different after the injection process, indicating complete

148 dispersion of the solution in the transformed fruit.

149

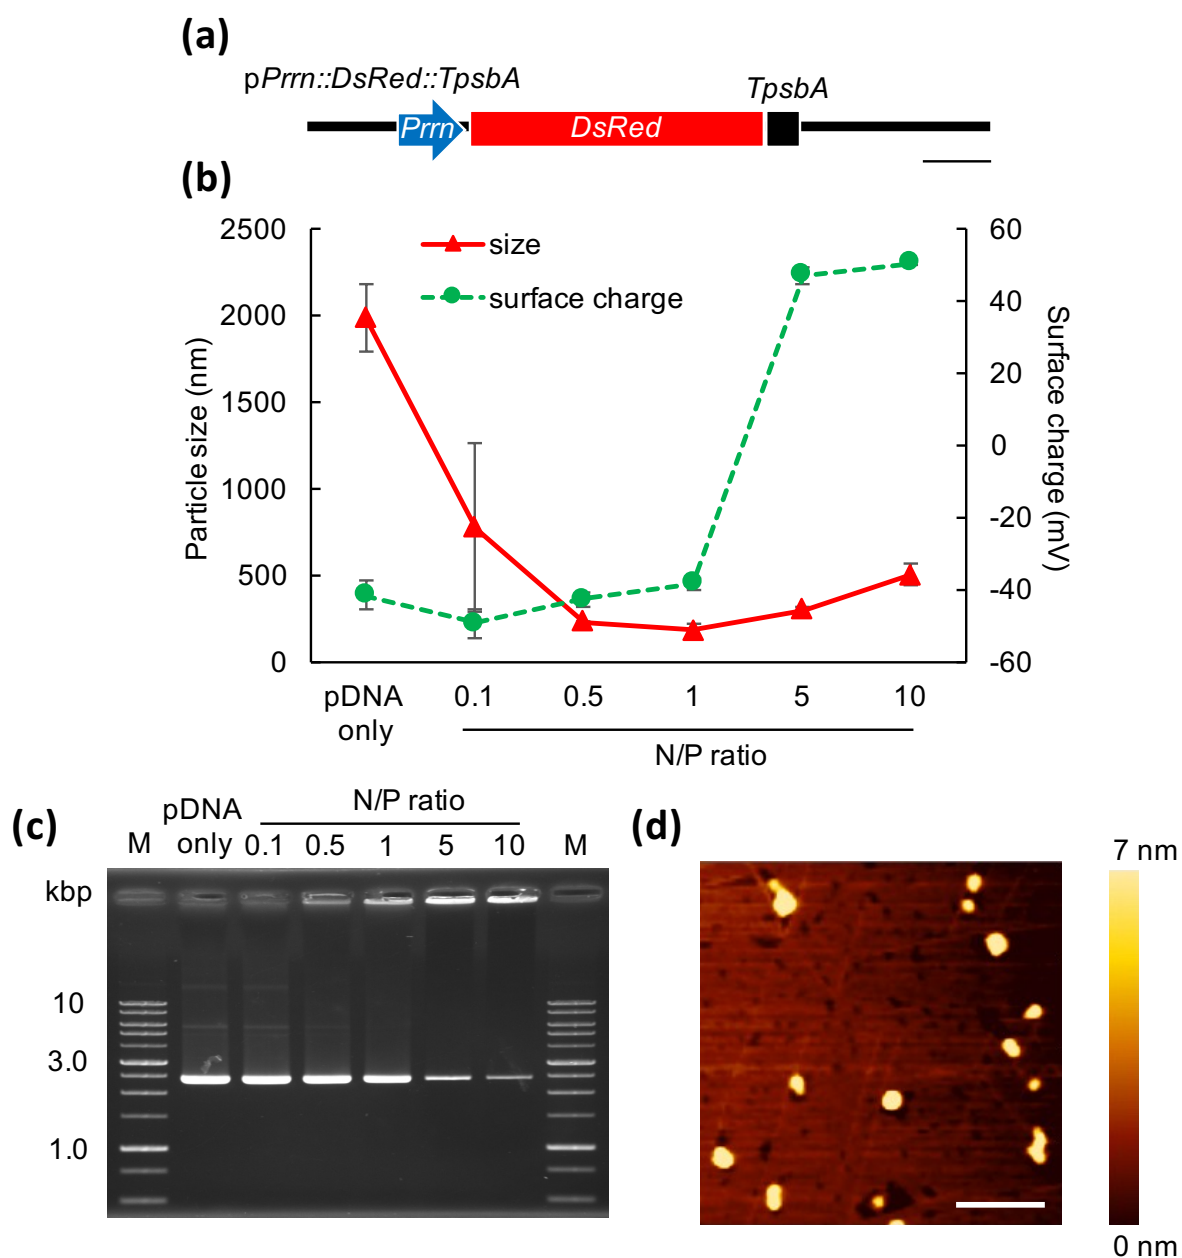

151  
 152 **Figure S11. Characterization of the pDNA(pPrm::DsRed::TpsbA)/KH<sub>9</sub>-OEP34**  
 153 **complexes.**  
 154 (a) Expression cassette for DsRed expression in plastids. Bar = 200 bp. (b) Particle size and  
 155 surface charge of the pDNA/KH<sub>9</sub>-OEP34 complexes formed at various N/P ratios. Error bars  
 156 show the SD of the average value from 3 replicates. (c) Electrophoretic mobility-shift assay of  
 157 the pDNA/KH<sub>9</sub>-OEP34 complexes at different N/P ratios. (d) AFM imaging of the  
 158 pDNA/KH<sub>9</sub>-OEP34 complexes formed at an N/P ratio of 1.0. Scale bar = 500 nm. The heat  
 159 map represents the height of complexes on the mica surface.

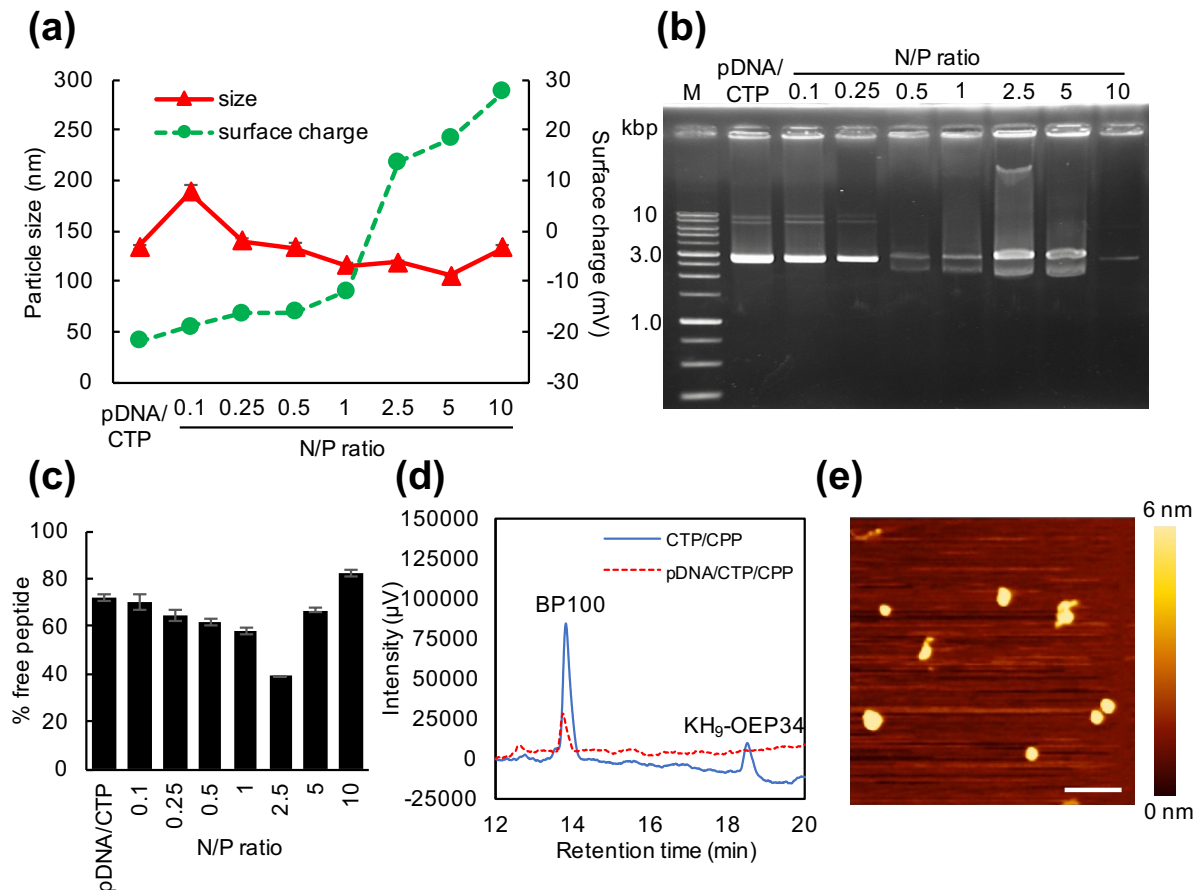

161  
 162 **Figure S12. Physiological properties of the clustered pDNA(pPrn::DsRed::TpsbA)/KH<sub>9</sub>-**  
 163 **OEP34/BP100 complexes for fluorescent reporter expression in plastids.**

164 Particle size and surface charge of the pDNA/KH<sub>9</sub>-OEP34/BP100 complexes formed at  
 165 various N/P ratios. Error bars represent the SD of the average value from three replicates. **(b)**  
 166 Gel-retardation assay of the pDNA/KH<sub>9</sub>-OEP34/BP100 complexes at different N/P ratios. **(c)**  
 167 Abundance of free peptide in the pDNA/CTP/CTP complex solution formed at different N/P  
 168 ratios. Error bars represent the standard deviation (SD) of the average intensity from three  
 169 replicates. **(d)** HPLC chromatogram of polypeptide solution with and without pDNA at N/P  
 170 ratio = 1.0. **(e)** AFM imaging of the pDNA/KH<sub>9</sub>-OEP34/BP100 complexes formed at an N/P  
 171 ratio of 1.0. Scale bar = 500 nm. The heat map shows the height of complexes on the mica  
 172 surface.

173

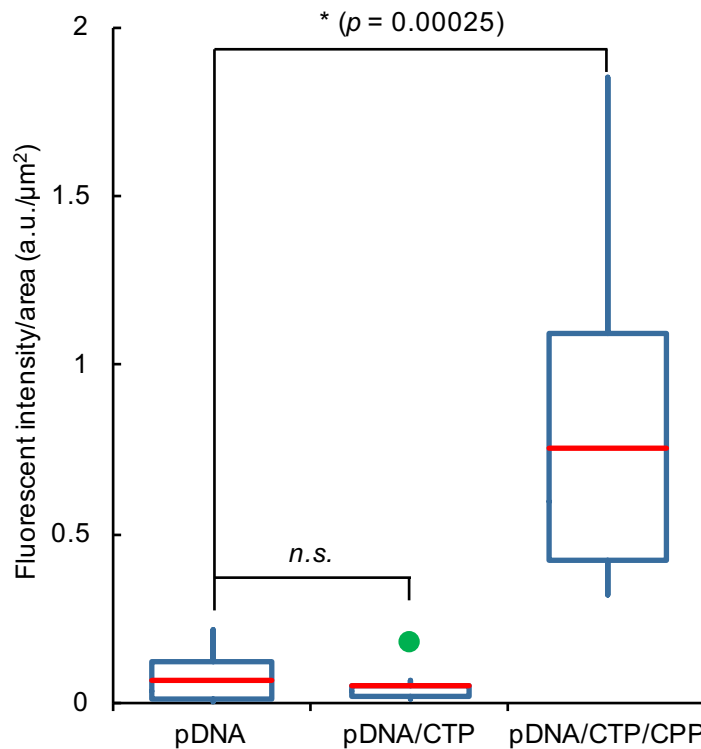

174

175 **Figure S13. DsRed overexpression in tomato pericarpic cells transfected by**  
 176 **pDNA/CTP/PPP complexes.**

177 DsRed expression in tomato pericarpic cells were observed by the CLSM at 24 hours post-  
 178 infiltration with pDNA/peptide complexes. The distributions of red fluorescent intensity per  
 179 area in 5 ROIs taken from pDNA only-treated and pDNA/CTP complex-infiltrated fruits ( $n =$   
 180 5) and 10 ROIs from pDNA/CTP/PPP complex-injected fruits ( $n = 10$ ) were represented by  
 181 box plot. The red lines indicate the mean of data. The green dot shows the outlier of the  
 182 distribution of data. The asterisk represents the significant difference of means between the  
 183 treatments analyzed by Student's *t-test*. n.s. = not significantly different at  $p < 0.05$ .

184

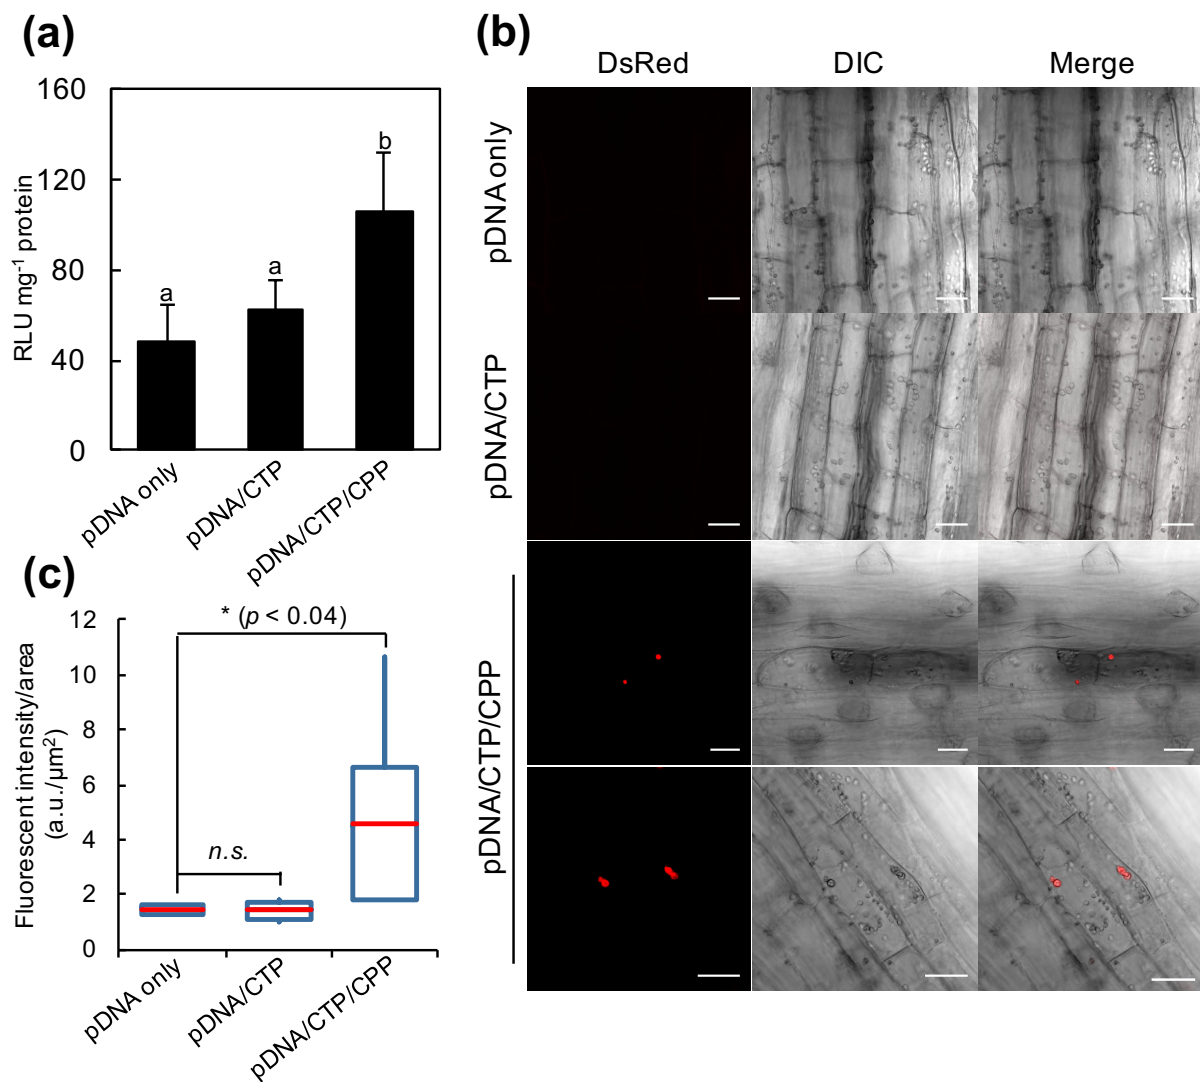

186

187 **Figure S14. Plastid transformation mediated by the clustered CTP/CPP complexes in**  
 188 **tomato roots.**

189 (a) *Renilla* luciferase activities in tomato roots transformed with *pPpsbA::Rluc* only,  
 190 pDNA/CTP complexes and clustered pDNA/CTP/CPP complexes at 24 hours post-infiltration.  
 191 Error bars represent the SD of the average Rluc activities in 4 biological independent samples  
 192 ( $n = 4$ ) for each treatment. Letters indicate the significant difference of means among the  
 193 treatment groups analyzed by one-way ANOVA and Tukey's HSD test at  $p = 0.05$ . (b) CLSM  
 194 imaging of plastids overexpressing DsRed in tomato root cells. A clustered  
 195 pDNA(*pPrn::DsRed::TpsbA*)/KH<sub>9</sub>-OEP34/BP100 complex solution and solutions containing  
 196 pDNA only or pDNA/CTP complexes were introduced into the root segments of 7-day-old  
 197 tomato seedlings by vacuum infiltration. CLSM observation was performed 24 hours after  
 198 infiltration. Scale bars = 20 μm. (c) Quantitative DsRed expression analysis of root cells



199 transfected with pDNA/peptide complexes. The expression of DsRed was observed by CLSM  
200 at 24 hours post-infiltration. The box plot represents the distributions of fluorescent intensity  
201 per area in 5 pDNA only- and pDNA/CTP complex-transfected roots ( $n = 5$ ), and 10  
202 pDNA/CTP/PPP complex-transfected roots ( $n = 10$ ). Red lines indicate the mean of data. The  
203 asterisk represents the significant difference of means analyzed by Student's *t-test*. n.s. = not  
204 significant different at  $p < 0.05$ .

205

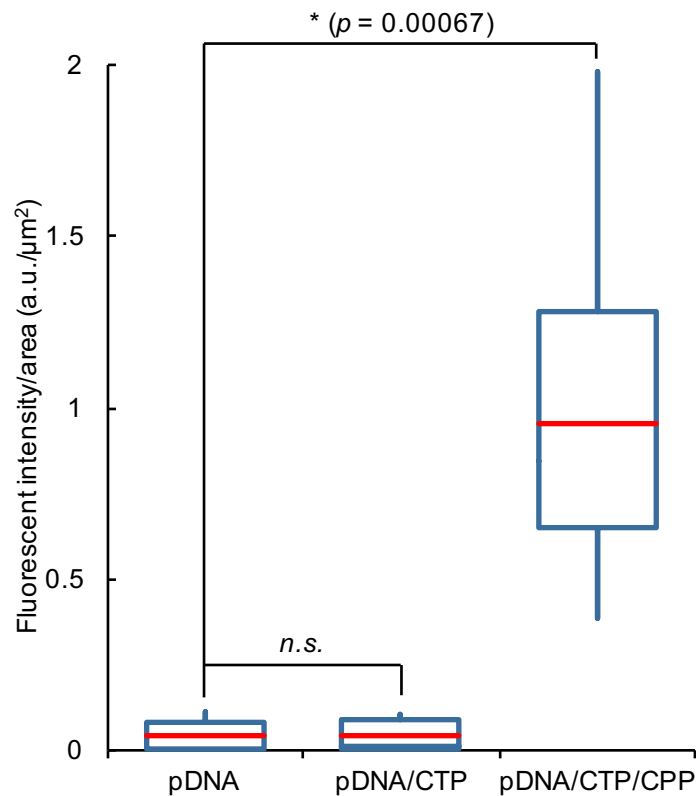

206

207 **Figure S15. DsRed expression in the amyloplasts in potato tuber cells.**

208 DsRed expression in potato tuber cells were observed by the CLSM at 24 hours post-  
 209 infiltration with pDNA/peptide complexes. The distributions of the red fluorescent intensities  
 210 in 5 ROIs taken from pDNA only-treated and pDNA/CTP complex-infiltrated fruits ( $n = 5$ )  
 211 and 10 ROIs from pDNA/CTP/CTP complex-injected fruits ( $n = 10$ ) were represented by box  
 212 plot. Red line indicates the mean of data. The asterisk represents the significant difference of  
 213 means between treatments analyzed by Student's *t*-test. n.s. = not significantly different at  $p <$   
 214 0.05.

215

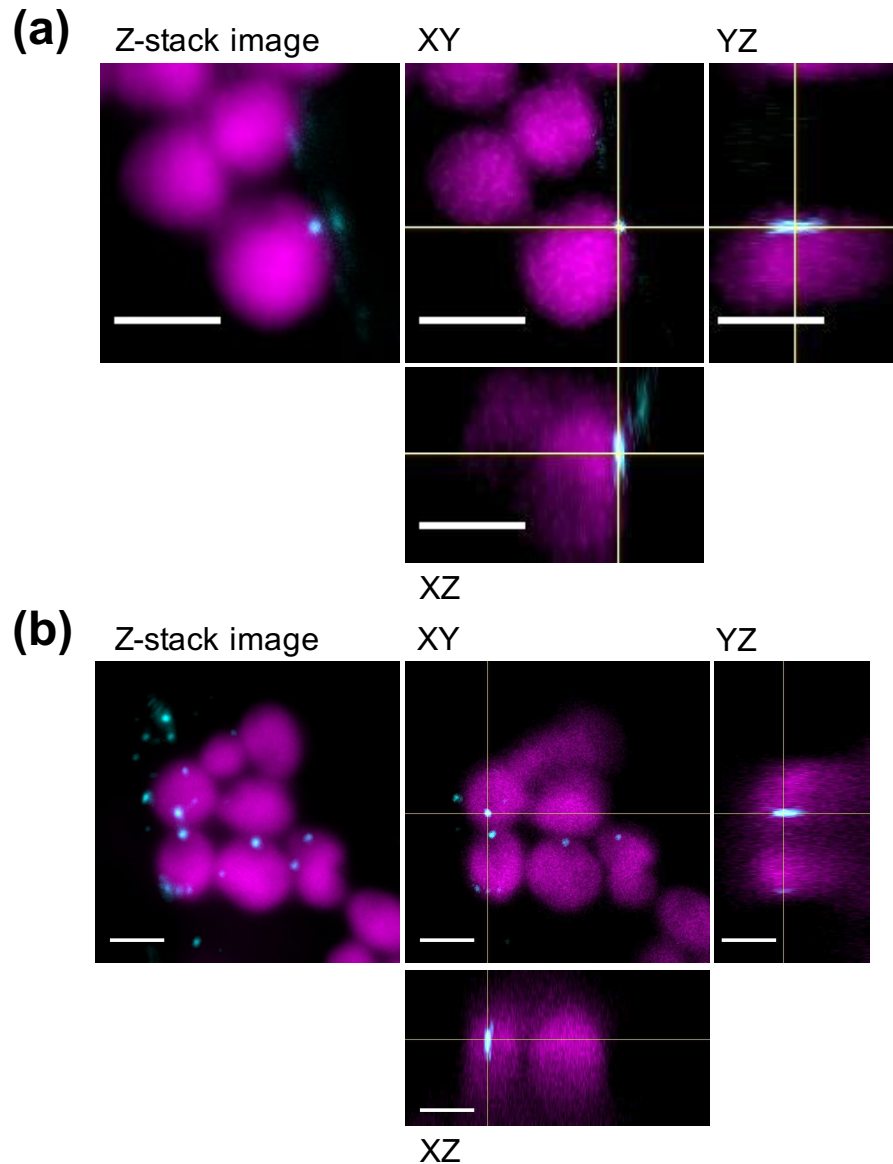

216

217 **Figure S16. Localization of Cy3-labeled pDNA molecules inside chloroplasts.**218 Z-stack imaging of Cy3 fluorescence colocalized with the chloroplasts of an *N. benthamiana*

219 leaf transformed with clustered Cy3-labeled pDNA/CTP/CPD complexes at 2 hours post-

220 infiltration (a) Association of the clustered Cy3-labeled pDNA/CTP complexes with the

221 chloroplast membrane. (b) Observation of the clustered Cy3-labeled pDNA molecule inside

222 the chloroplasts of leaf cells transformed with the clustered Cy3-pDNA/CTP/CPD complexes.

223 Scale bars = 5  $\mu\text{m}$ .

224

225

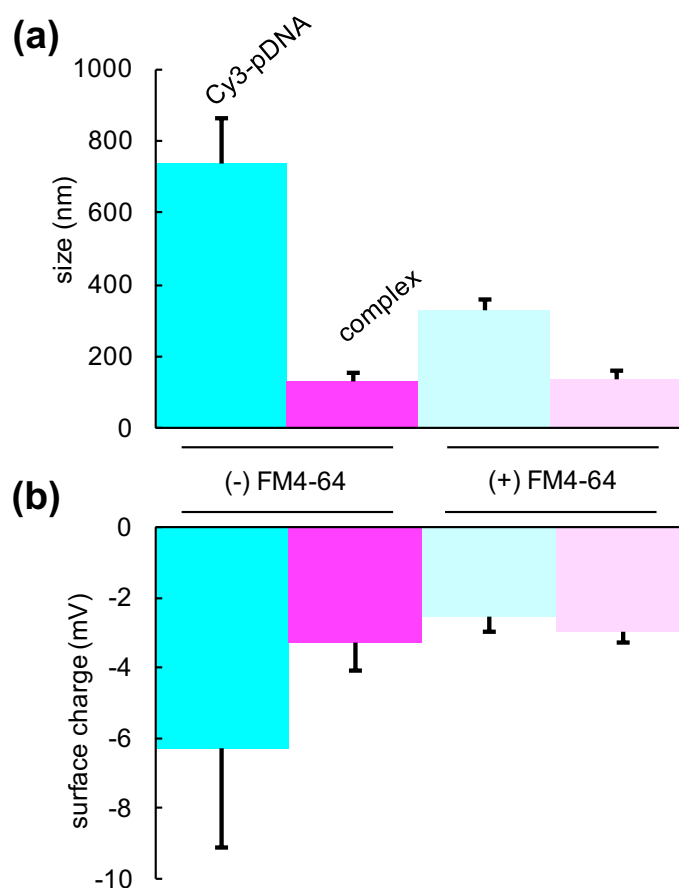

226

227 **Figure S17. Effects of FM4-64 on the size and surface charge of plasmid DNA and**  
228 **clustered pDNA/CTP/CPP complexes.**

229 Particle size (a) and surface charge (b) of the Cy3-labeled *pPpsbA::Rluc* (pDNA)/CTP/CPP  
230 complexes (complex) and free Cy3-pDNA molecule (Cy3-pDNA) in a solution with (+) or  
231 without (-) 10  $\mu\text{m}$  FM4-64 analyzed by a Zeta Nanosizer. Error bars represent the SD of the  
232 average value from three replicates.

233

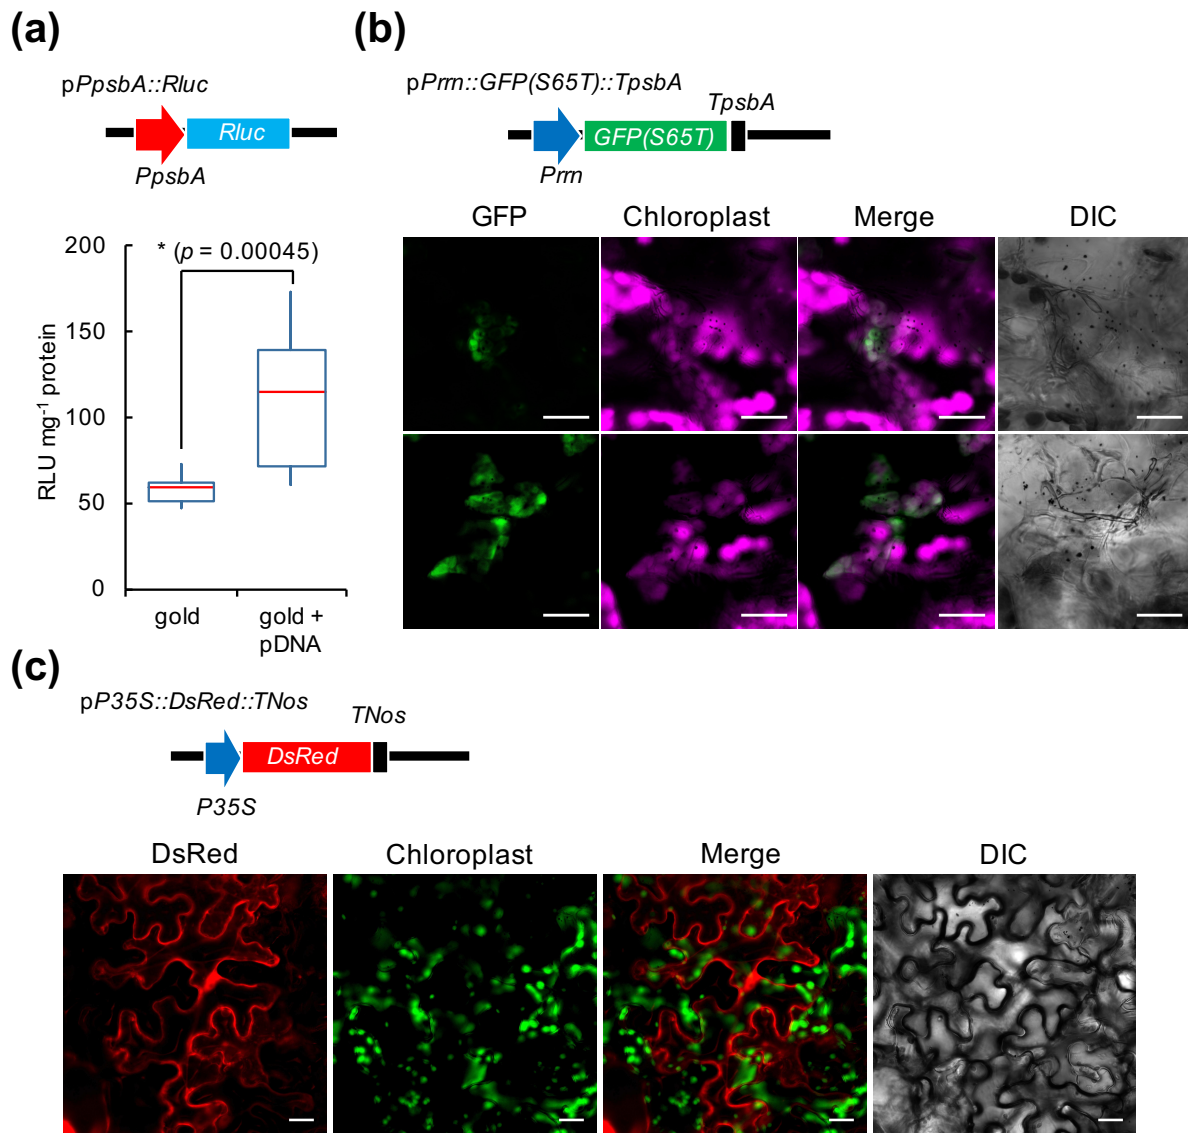

234

235 **Figure S18. Expressions of reporter proteins in plant cells mediated by biolistic particle**  
 236 **bombardment.**

237 **(a)** *Renilla* luciferase activity in Arabidopsis leaves transfected with gold particle only (gold)  
 238 or gold particle coated with  $pPpsbA::Rluc$  (gold + pDNA) at 24 hours post-transfection. The  
 239 distribution of luciferase activities in plant leaves was shown as the box plot. Red lines  
 240 represent the median of data distribution. The asterisk indicates the statistical significant  
 241 difference between two treatments analyzed by Student's *t*-test ( $n = 10$ ). **(b)** Expression of  
 242 GFP in the chloroplasts of Arabidopsis leaf cells mediated by particle bombardment.  
 243 Arabidopsis leaves were bombarded with gold particles coated with  
 244  $pPrm::GFP(S65T)::TpsbA$ . The CLSM observation were carried out at 24 hours post-  
 245 transfection. **(c)** Expression of DsRed in cytoplasm of plant cells at 24 hours post-transfection  
 246 with  $pP35S::DsRed::TNos$ -coated gold particles using particle bombardment. Scale bars = 20  
 247  $\mu m$ .

248

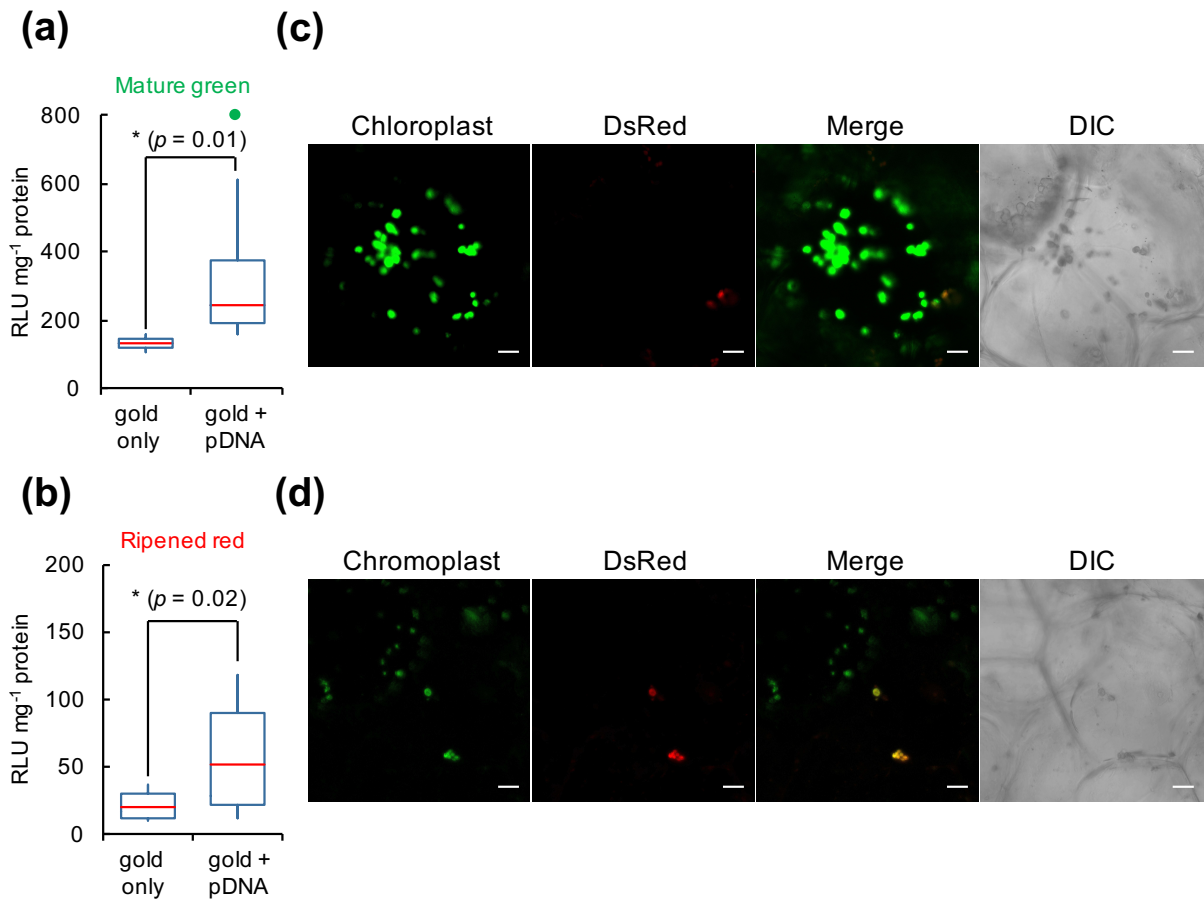

249

250 **Figure S19. Expression of reporter proteins in tomato fruit cells mediated by biolistic**  
 251 **particle bombardment.**

252 Luciferase activities in tomato mature green (a) and ripened red fruits (b) transfected with  
 253 *pPpsbA::Rluc* by particle bombardment. Gold particles coated with the pDNA or gold  
 254 particles only were bombarded to tomato fruit slices. Rluc activity in total fruit proteins was  
 255 assayed at 24 hours post-bombardment. The distributions of Rluc activity in 10 samples ( $n =$   
 256 10) were shown as the box plot. Red lines indicate the median of the distribution of data.  
 257 Green dot represents an outlier in the data distribution. Asterisk represents the significant  
 258 difference of mean analyzed by Student's *t-test*. (c) and (d) Expressions of DsRed in plastids  
 259 in pericarpic cells of mature green (c) and ripened red (d) tomato fruit slices. Tomato fruit  
 260 slices were bombarded with *pPrn::DsRed::TpsbA*-coated gold nanocarriers and CLSM  
 261 observation was performed at 24 hours post-transformation. Chlorophyll and carotenoids  
 262 autofluorescences in chloroplasts and chromoplasts, respectively, were shown by green color.  
 263 Scale bars = 20  $\mu\text{m}$ .

264



272 **Table S2.** Plasmid DNA molecules used in this study

| Name                          | Gene expression cassette     | Promoter               | Terminator        | Vector backbone | Size (kilobase) |
|-------------------------------|------------------------------|------------------------|-------------------|-----------------|-----------------|
| <i>pPpsbA::Rluc</i>           | <i>PpsbA::Rluc</i>           | <i>psbA</i> promoter   | Terminator-less   | pMDC107         | 11              |
| <i>pPrn::GFP(S65T)::TpsbA</i> | <i>Prn::GFP(S65T)::TpsbA</i> | <i>rrn16S</i> promoter | <i>psbA-3'UTR</i> | pUC19           | 3.7             |
| <i>pPrn::DsRed::TpsbA</i>     | <i>Prn::DsRed::TpsbA</i>     | <i>rrn16S</i> promoter | <i>psbA-3'UTR</i> | pUC19           | 3.4             |

273

274



275 **Table S3.** Polydispersity index (PDI) of the *pPpsbA::Rluc*/KH<sub>9</sub>-OEP34 complexes formed at  
 276 different N/P ratios as measured by DLS. The data are presented as the mean  $\pm$  SD of three  
 277 replicates.

| N/P ratio | PDI               |
|-----------|-------------------|
| 0         | 0.957 $\pm$ 0.074 |
| 0.1       | 0.697 $\pm$ 0.126 |
| 0.5       | 0.341 $\pm$ 0.041 |
| 1.0       | 0.552 $\pm$ 0.022 |
| 2.5       | 0.471 $\pm$ 0.006 |
| 5.0       | 0.525 $\pm$ 0.059 |
| 10        | 0.792 $\pm$ 0.038 |
| 25        | 0.577 $\pm$ 0.021 |

278

279 **Table S4.** Polydispersity index (PDI) of the *pPpsbA::Rluc*/KH<sub>9</sub>-OEP34/BP100 complexes  
 280 formed at different N/P ratios as measured by DLS. The data are presented as the mean  $\pm$  SD  
 281 of three replicates.

| N/P ratio | PDI               |
|-----------|-------------------|
| 0         | 0.275 $\pm$ 0.040 |
| 0.1       | 0.342 $\pm$ 0.033 |
| 0.25      | 0.349 $\pm$ 0.022 |
| 0.5       | 0.218 $\pm$ 0.006 |
| 1.0       | 0.405 $\pm$ 0.020 |
| 2.5       | 0.443 $\pm$ 0.012 |
| 5.0       | 0.401 $\pm$ 0.006 |
| 10        | 0.285 $\pm$ 0.017 |

282

283

284 **Table S5.** Polydispersity index (PDI) of p*Prrn*::*GFP(S65T)*::*TpsbA*/KH<sub>9</sub>-OEP34 complexes  
 285 formed at different N/P ratios as measured by DLS. The data are presented as the mean  $\pm$  SD  
 286 of three replicates.

| N/P ratio | PDI               |
|-----------|-------------------|
| 0         | 0.558 $\pm$ 0.499 |
| 0.1       | 0.894 $\pm$ 0.184 |
| 0.5       | 0.447 $\pm$ 0.117 |
| 1.0       | 0.386 $\pm$ 0.042 |
| 5.0       | 0.383 $\pm$ 0.165 |
| 10        | 0.395 $\pm$ 0.023 |

287

288 **Table S6.** Polydispersity index (PDI) of p*Prrn*::*GFP(S65T)*::*TpsbA*/KH<sub>9</sub>-OEP34/BP100  
 289 complexes formed at different N/P ratios as measured by DLS. The data are presented as the  
 290 mean  $\pm$  SD of three replicates.

| N/P ratio | PDI               |
|-----------|-------------------|
| 0         | 0.363 $\pm$ 0.029 |
| 0.1       | 0.336 $\pm$ 0.022 |
| 0.25      | 0.587 $\pm$ 0.105 |
| 0.5       | 0.420 $\pm$ 0.005 |
| 1.0       | 0.415 $\pm$ 0.020 |
| 2.5       | 0.403 $\pm$ 0.007 |
| 5.0       | 0.390 $\pm$ 0.013 |
| 10        | 0.390 $\pm$ 0.014 |

291

292

293 **Table S7.** Polydispersity index (PDI) of p*Prrn*::*DsRed*::*TpsbA*/KH<sub>9</sub>-OEP34 complexes  
 294 formed at different N/P ratios as measured by DLS. The data are presented as the mean ± SD  
 295 of three replicates.

| N/P ratio | PDI           |
|-----------|---------------|
| 0         | 0.405 ± 0.454 |
| 0.1       | 0.902 ± 0.169 |
| 0.5       | 0.512 ± 0.046 |
| 1.0       | 0.330 ± 0.163 |
| 5.0       | 0.374 ± 0.014 |
| 10        | 0.631 ± 0.319 |

296  
 297 **Table S8.** Polydispersity index (PDI) of p*Prrn*::*DsRed*::*TpsbA*/KH<sub>9</sub>-OEP34/BP100  
 298 complexes formed at different N/P ratios as measured by DLS. The data are presented as the  
 299 mean ± SD of three replicates.

| N/P ratio | PDI           |
|-----------|---------------|
| 0         | 0.457 ± 0.082 |
| 0.1       | 0.709 ± 0.031 |
| 0.25      | 0.592 ± 0.030 |
| 0.5       | 0.384 ± 0.009 |
| 1.0       | 0.380 ± 0.002 |
| 2.5       | 0.291 ± 0.032 |
| 5.0       | 0.336 ± 0.009 |
| 10        | 0.404 ± 0.014 |

300

301

302 **Table S9.** Primers used in this research. The underlined sequences in the primers represent  
 303 restriction enzyme digestion sites.

| Primer name         | Sequence (5' – 3')                         | length (bp) | Specific sequence                |
|---------------------|--------------------------------------------|-------------|----------------------------------|
| <i>PpsbA</i> _F     | <u>TCTAGAT</u> CTACATACACCTTGGTTGACAC      | 29          | <i>Ntpsba</i> promoter           |
| <i>PpsbA</i> _R     | <u>GGATCC</u> GCTTAATTTCTCCTCTTTAGTTCTTGG  | 33          |                                  |
| <i>Prrn</i> _F      | <u>TCTAGAG</u> CTCCCCGCGTCGTTTC            | 24          | <i>Ntrrn16</i> promoter          |
| <i>Prrn</i> _R      | <u>ACCATGGG</u> TCCCTCCCTACAACCTCAC        | 27          |                                  |
| <i>Rluc</i> _F      | <u>GGATCC</u> ATGACTTCGAAAGTTTATGATC       | 28          | <i>Rluc</i> gene                 |
| <i>Rluc</i> _R      | <u>GAATTC</u> TATTGTTCAATTTTTGAGAACTCGCTC  | 33          |                                  |
| <i>GFP(S65T)</i> _F | <u>CCATGG</u> ATGCGTAAAGGCGAAGAGCTG        | 27          | <i>GFP(S65T)</i> gene            |
| <i>GFP(S65T)</i> _R | <u>GGATCC</u> TCATTTGTACAGTTCATCCATACCATGC | 34          |                                  |
| <i>DsRed</i> _F     | <u>CCATGG</u> ATGGACAACACCGAGGACGTC        | 27          | <i>DsRed</i> gene                |
| <i>DsRed</i> _R     | <u>GGATCC</u> CTACTGGGAGCCGGAGTGG          | 25          |                                  |
| <i>TpsbA</i> _F     | <u>GGATCC</u> TCAAGAGCGATCCTGGCCTAG        | 27          | <i>Ntpsba3'-UTR</i> (Terminator) |
| <i>TpsbA</i> _R     | <u>GAATTC</u> TAAATGCAAGAAAATAACCTCTCCTTC  | 33          |                                  |

304 *Nt* – *Nicotiana tabacum*, 3'-UTR – 3'-untranslated region

305

306

307

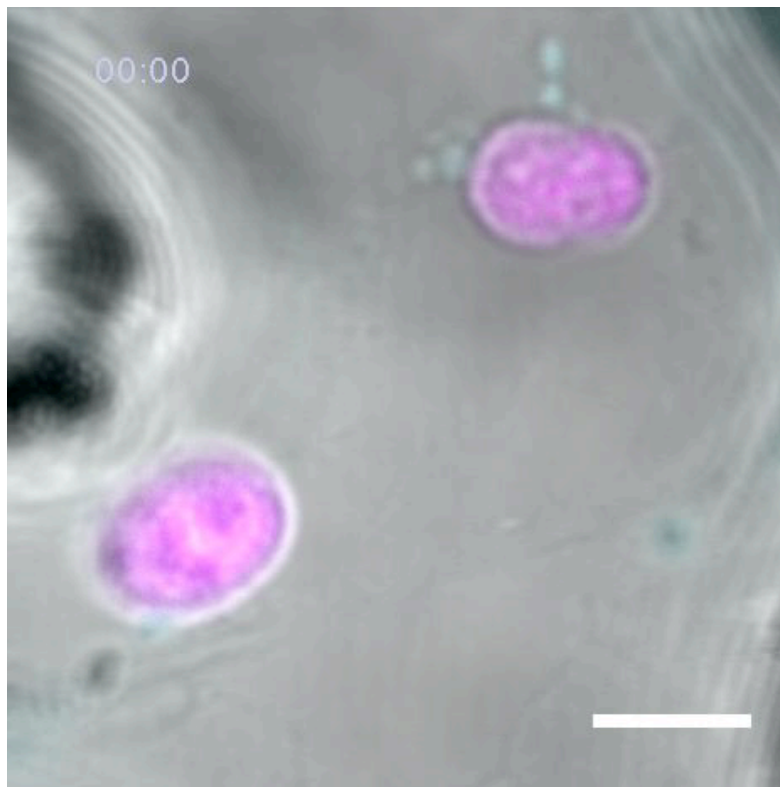

308

**309 Movie S1. Intracellular trafficking of pDNA/peptide complexes to chloroplasts.**

310 Time-course observation of Cy3-labeled pDNA/peptide complexes was performed 2 hours  
311 after infiltration of the complexes into *N. benthamiana* leaves. Twenty images were collected  
312 within 76 seconds of observation by CLSM imaging. Cyan represents the fluorescent signals  
313 from Cy3-labeled pDNA molecules. Magenta represents the autofluorescence signal from  
314 chlorophyll in the chloroplasts. Scale bar = 5  $\mu\text{m}$ .

315

316 References:

- 317 [1] T. Yoshizumi, K. Oikawa, J. A. Chuah, Y. Kodama, K. Numata, *Biomacromolecules*  
318 **2018**, 19, 1582.
- 319 [2] J. A. Chuah, T. Yoshizumi, Y. Kodama, K. Numata, *Sci Rep* **2015**, 5, 7751.
- 320 [3] K. K. Ng, Y. Motoda, S. Watanabe, A. Sofiman Othman, T. Kigawa, Y. Kodama, K.  
321 Numata, *PLoS One* **2016**, 11, e0154081.
- 322 [4] a) K. Numata, M. Ohtani, T. Yoshizumi, T. Demura, Y. Kodama, *Plant Biotechnol J*  
323 **2014**, 12, 1027; b) M. Lakshmanan, Y. Kodama, T. Yoshizumi, K. Sudesh, K. Numata,  
324 *Biomacromolecules* **2013**, 14, 10.
- 325
